# Supplementary material for: An archived activation tagged population of Arabidopsis thaliana to facilitate forward genetics approaches
Source: PubMed Central journal article supplement (PMC3091532; doi:10.1186/1471-2229-9-101), 2009-07-31

**Additional file 1.**

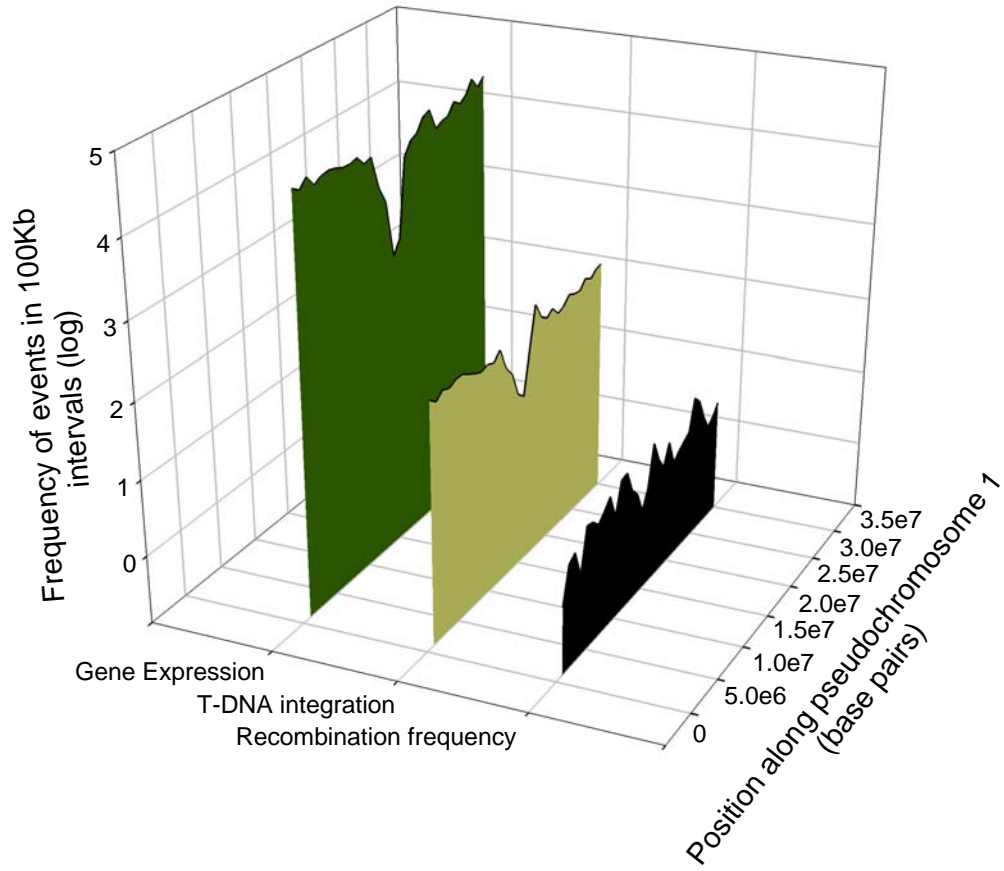

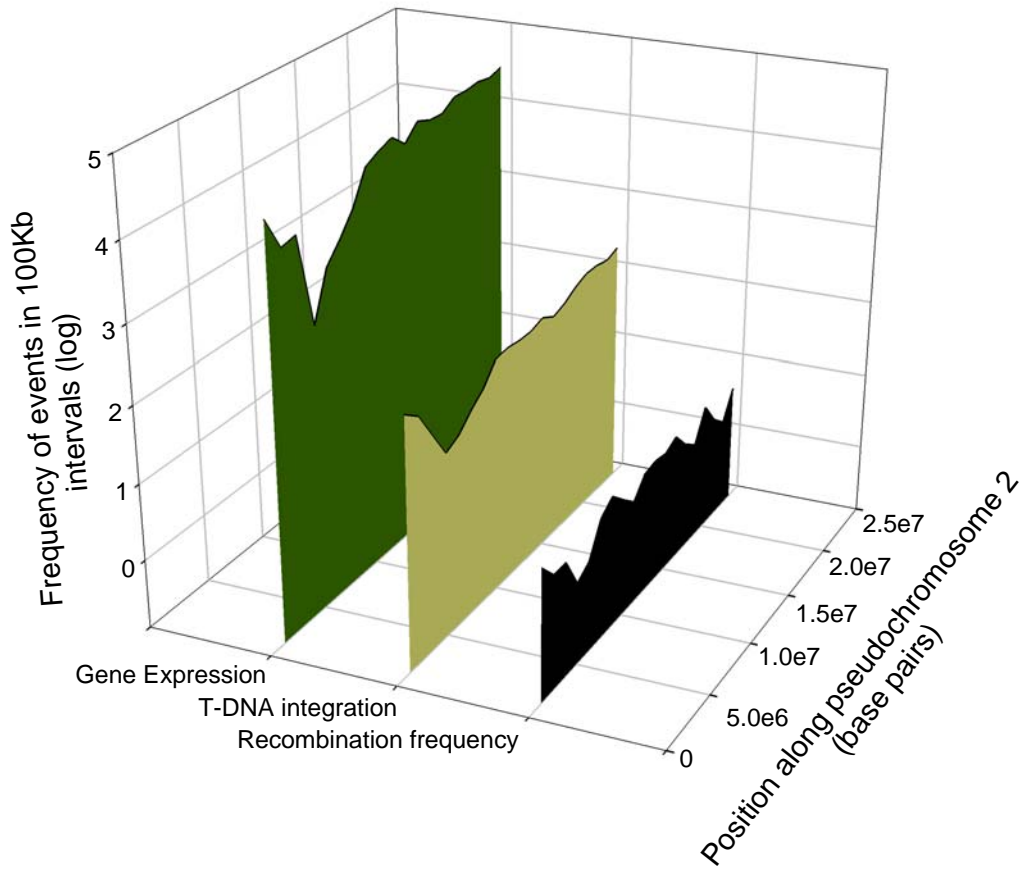

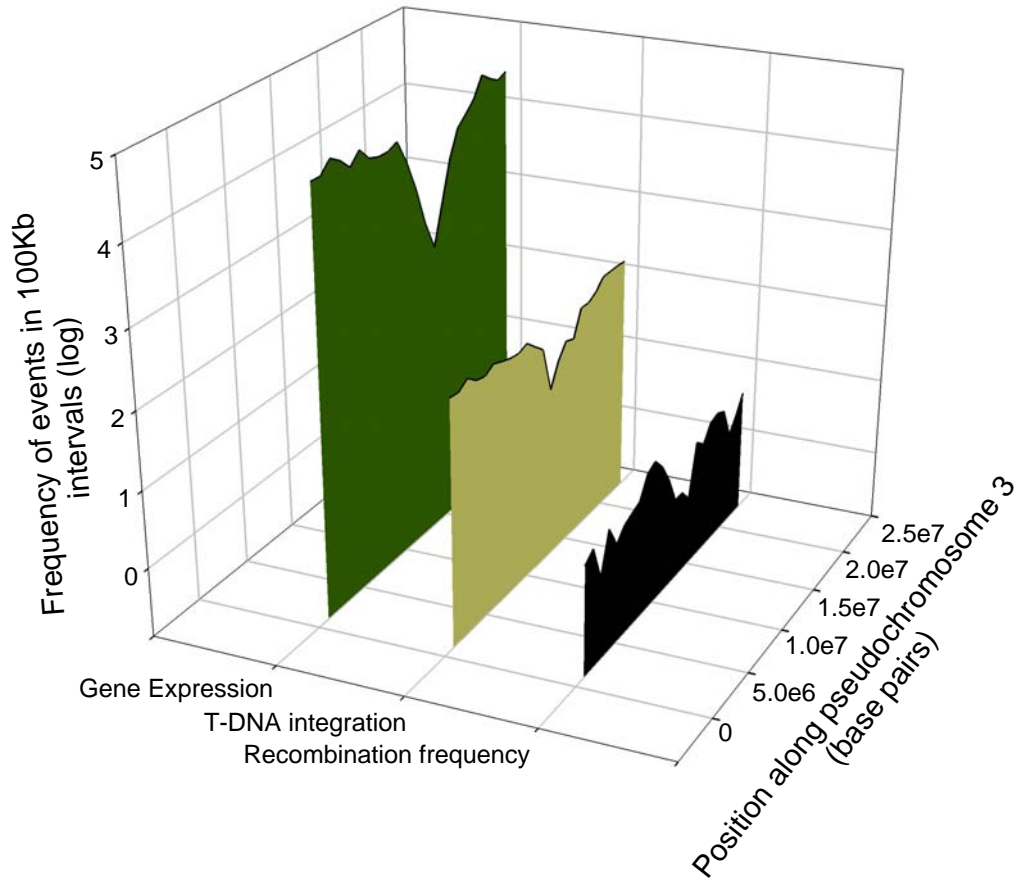

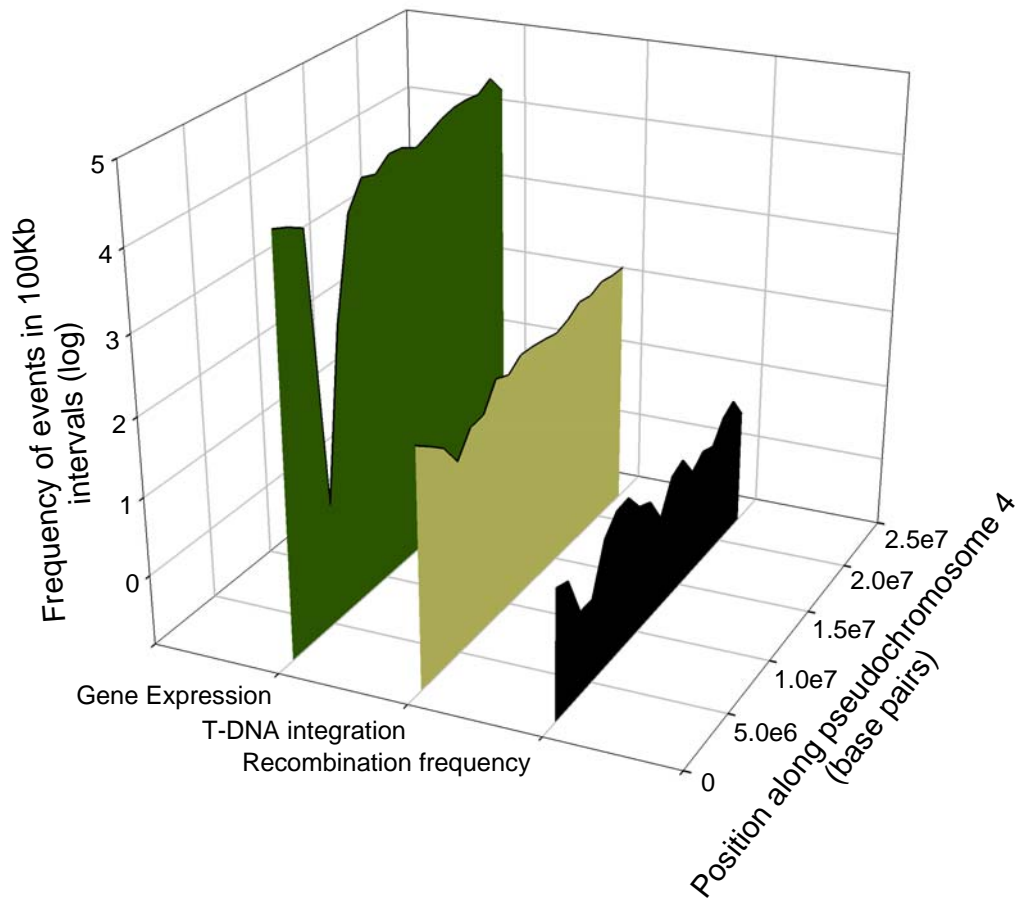

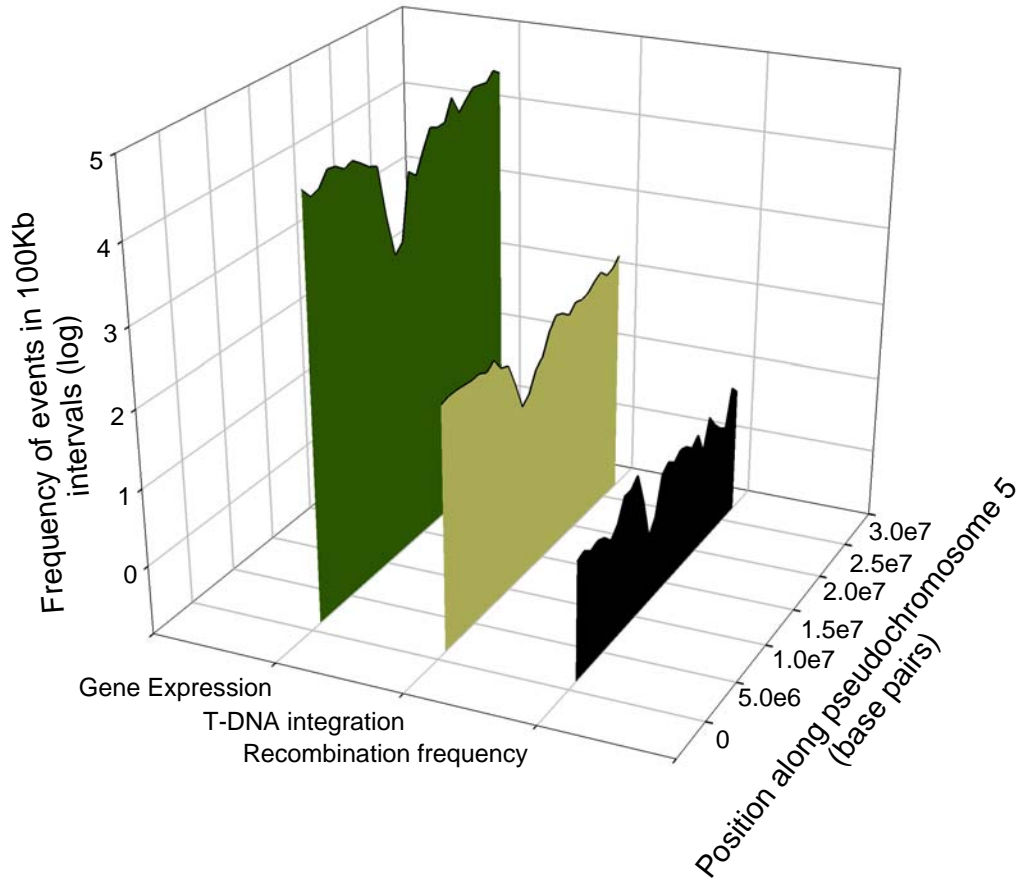

Supplement: 1471-2229-9-101-S1.pdf [file 1471-2229-9-101-S1.pdf]
