# Supplementary material for: An archived activation tagged population of Arabidopsis thaliana to facilitate forward genetics approaches
Source: PubMed Central journal article supplement (PMC3091532; doi:10.1186/1471-2229-9-101), 2009-07-31
Supplement: 1471-2229-9-101-S2.pdf [file 1471-2229-9-101-S2.pdf]

## Additional file 2.

### Gene expression level

Genes with no insertion events - None

Genes with insertion events - Present

| Data    | Mean    | Standard Deviation | Median | Upper Quartile | Lower Quartile | n    |
|---------|---------|--------------------|--------|----------------|----------------|------|
| None    | 68.175  | 233.987            | 7.720  | 28.653         | 2.580          | 1913 |
| Present | 125.032 | 243.122            | 48.887 | 131.983        | 10.350         | 1913 |

Jarque-Bera Test:

|         | JB         | Skewness | Kurtosis |
|---------|------------|----------|----------|
| None    | 459095.188 | 8.393    | 99.133   |
| Present | 119579.022 | 5.299    | 40.254   |

Probability: < 0.0001

Mann-Whitney-Wilcoxon Test:

-----  
Dataset | n | Rank sum: observed / expected

-----  
1 | 1913 | 2909214 /3659569

-----  
2 | 1913 | 4411836 /3659569  
-----

N (size of both datasets): 3826

z: -21.992058

Probability: <0.000001

Ranks of genes with no insertions are lower than expected

Plot of the distributions:

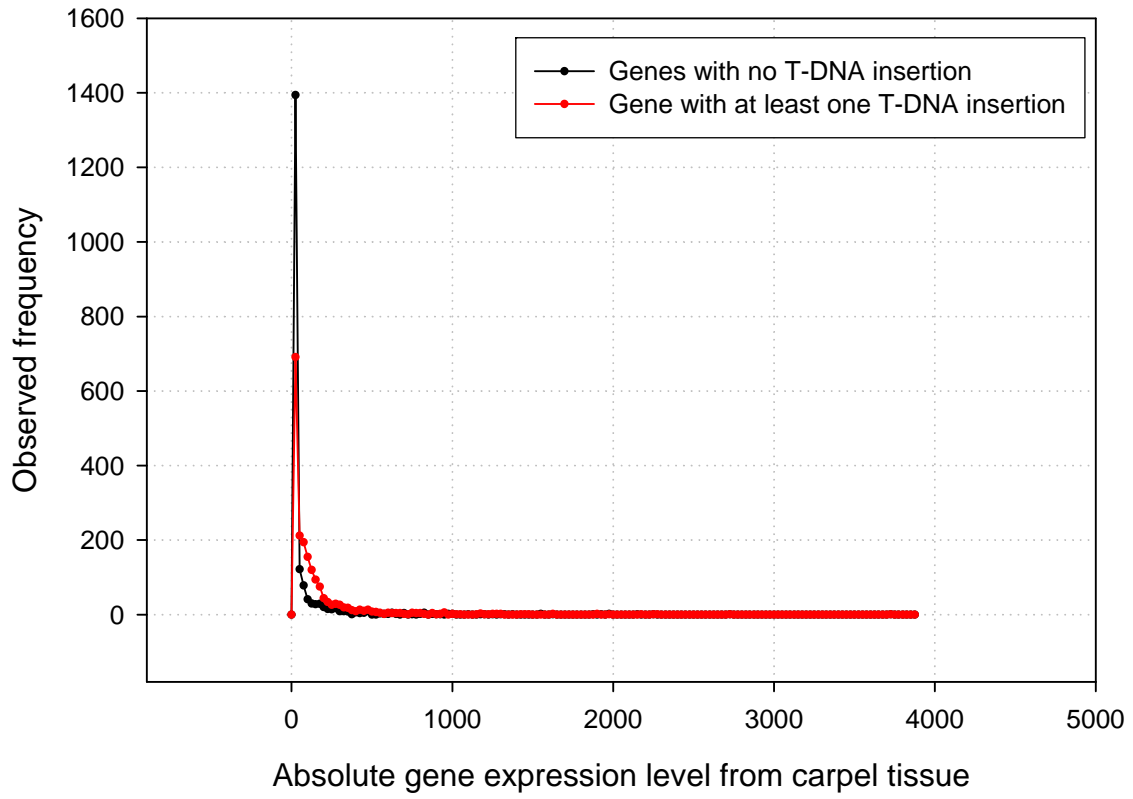

## Gene length – transcript (bp)

Genes with no insertion events - None

Genes with insertion events - Present

| Data    | Mean     | Standard<br>Deviation | Median   | Upper<br>Quartile | Lower<br>Quartile | n    |
|---------|----------|-----------------------|----------|-------------------|-------------------|------|
| None    | 1131.756 | 911.020               | 841.000  | 1467.500          | 505.000           | 4806 |
| Present | 2418.472 | 1614.947              | 2081.500 | 3037.000          | 1358.000          | 4806 |

Jarque-Bera Test:

|         | JB         | Skewness | Kurtosis |
|---------|------------|----------|----------|
| None    | 11244.068  | 2.438    | 8.690    |
| Present | 248262.798 | 4.008    | 37.285   |

Probability: < 0.0001

Mann-Whitney-Wilcoxon Test:

-----  
Dataset | n | rank sum: observed / expected

-----  
1 | 4806 | 16145421 /23097636

-----  
2 | 4806 | 30054657 /23097636  
-----

N (size of both datasets): 9612

z: -1048041.30282

Probability: <0.000001

Ranks of genes with no insertions are lower than expected

Plot of the distributions:

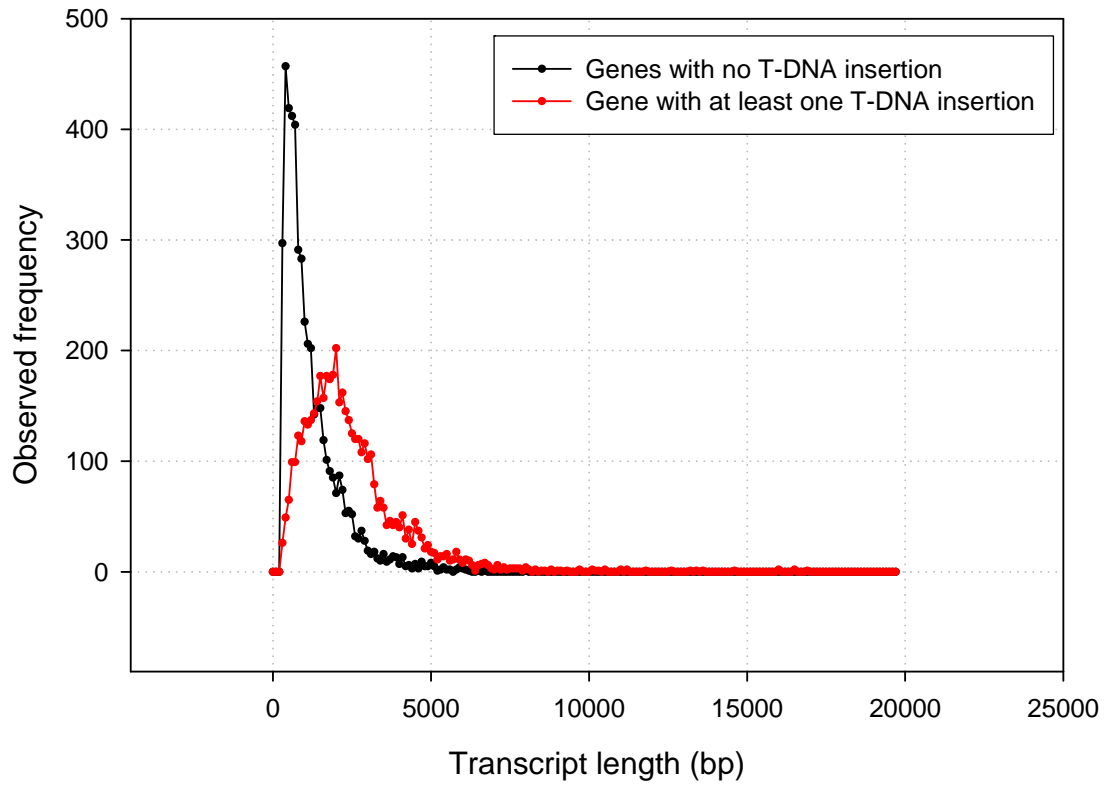

## Position relative to the centromere (Kbp)

Genes with no insertion events - None

Genes with insertion events - Present

| Data    | Mean     | Standard<br>Deviation | Median | Upper<br>Quartile | Lower<br>Quartile | n    |
|---------|----------|-----------------------|--------|-------------------|-------------------|------|
| None    | 5069.832 | 4279.960              | 3631.0 | 8115.5            | 1406127.5         | 4806 |
| Present | 7714.580 | 4173.393              | 7803.0 | 11109.0           | 4142395.0         | 4806 |

Jarque-Bera Test:

|         | JB       | Skewness | Kurtosis |
|---------|----------|----------|----------|
| None    | 1723.144 | 1.434    | 2.380    |
| Present | 1657.428 | 1.331    | 1.910    |

Probability: < 0.0001

Mann-Whitney-Wilcoxon Test:

-----  
Dataset | n | Rank sum: observed / expected

-----  
1 | 4806 | 18915972 /23097636

-----  
2 | 4806 | 27284105 /23097636  
-----

N (size of both datasets): 9612

z: -30.759262

Probability: <0.000001

Ranks of genes with no insertion are lower than expected

Plot of the distributions:

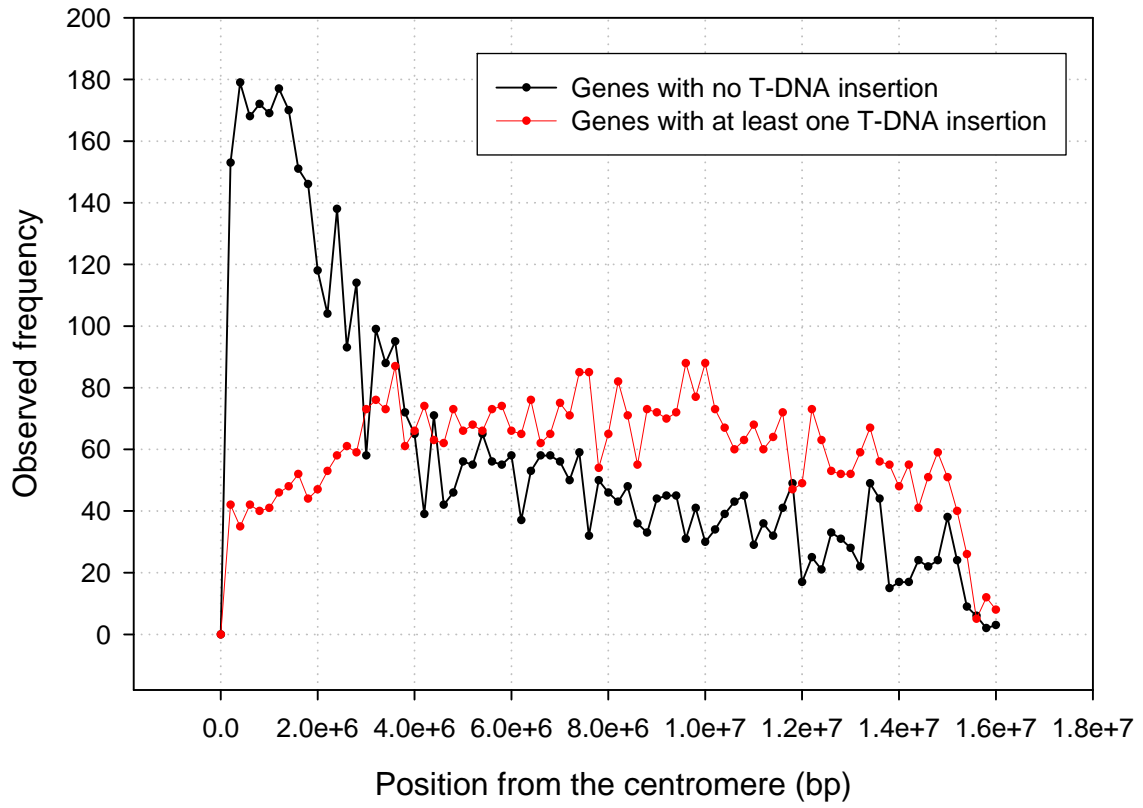

**A)  $\chi^2$  contingency tables for basic gene characteristics:**

i) Intron sequences:

|                     | Genes with T-DNA hit | Genes with no T-DNA hit |
|---------------------|----------------------|-------------------------|
| Genes with intron   | 22,940               | 2,496                   |
| Gene without intron | 4,338                | 3,508                   |
| $X^2$ 1d.f.         | 4,941                | $P < 0.0001$            |

ii) Annotated pseudogenes:

|             | Genes with T-DNA hit | Genes with no T-DNA hit |
|-------------|----------------------|-------------------------|
| Genes       | 26,293               | 5,250                   |
| Pseudogenes | 985                  | 754                     |
| $X^2$ 1d.f. | 794                  | $P < 0.0001$            |

ii) Annotated single copy genes:

|                   | Genes with T-DNA hit | Genes with no T-DNA hit |
|-------------------|----------------------|-------------------------|
| Gene family       | 24,140               | 5,509                   |
| Single copy genes | 3,138                | 495                     |
| $X^2$ 1d.f.       | 53.8                 | $P < 0.0001$            |

**B) Proportional analysis of the 6,004 genes without a T-DNA integration**

i) Genes lacking intron sequences (23.5% of the total):

|             | Genes with no introns | Genes with introns |
|-------------|-----------------------|--------------------|
| Observed:   | 2,919                 | 3,085              |
| Expected:   | 4,593                 | 1,411              |
| $X^2$ 1d.f. | 2,596.1               | $P < 0.0001$       |

ii) Genes annotated as pseudogenes (5.2% of the total):

|             | Annotated Genes | Annotated pseudogenes |
|-------------|-----------------|-----------------------|
| Observed:   | 5,250           | 754                   |
| Expected:   | 5,692           | 312                   |
| $X^2$ 1d.f. | 660.5           | $P < 0.0001$          |

iii) Genes present as a single copy (11.2% of the total):

|             | Duplicated Genes | Single Copy Genes |
|-------------|------------------|-------------------|
| Observed:   | 5,508            | 496               |
| Expected:   | 5,344            | 660               |
| $X^2$ 1d.f. | 45.8             | $P < 0.0001$      |
