# Supplementary material for: An archived activation tagged population of Arabidopsis thaliana to facilitate forward genetics approaches
Source: PubMed Central journal article supplement (PMC3091532; doi:10.1186/1471-2229-9-101), 2009-07-31
Supplement: 1471-2229-9-101-S3.pdf [file 1471-2229-9-101-S3.pdf]

### Additional file 3.

#### A). FST sequence adjacent to a T-DNA LB

BLASTN 2.2.16 [Mar-25-2007]

Reference: Altschul, Stephen F., Thomas L. Madden, Alejandro A. Schaffer, Jinghui Zhang, Zheng Zhang, Webb Miller, and David J. Lipman (1997), "Gapped BLAST and PSI-BLAST: a new generation of protein database search programs", *Nucleic Acids Res.* 25:3389-3402.

Query= Skbox-reseq1-1\_A15\_sk3257\_033.ab1 CHROMAT\_FILE:  
Skbox-reseq1-1\_A15\_sk3257\_033.ab1 PHD\_FILE:  
Skbox-reseq1-1\_A15\_sk3257\_033.ab1.phd.1 CHEM: term DYE: big TIME: Fri  
Mar 2 17:06:28 2007  
(733 letters)

Database: TAIR 8 pseudochromosome database created by Steve on July 15  
2008

7 sequences; 119,707,899 total letters

Searching.....done

| Sequences producing significant alignments:                                                                     | Score<br>(bits)                                               | E<br>Value |
|-----------------------------------------------------------------------------------------------------------------|---------------------------------------------------------------|------------|
| Chr1 dumped from ADB: Mar/14/08 12:28; last updated: 2007-12-20                                                 | 1049                                                          | 0.0        |
| >Chr1 dumped from ADB: Mar/14/08 12:28; last updated: 2007-12-20<br>Length = 30432563                           |                                                               |            |
| Score = 1049 bits (529), Expect = 0.0<br>Identities = 545/549 (99%), Gaps = 1/549 (0%)<br>Strand = Plus / Minus |                                                               |            |
| Query: 87                                                                                                       | tgatggttttttttaacgtgagggtgaggcgtgccataaatttagggcgcgtttctttaa  | 146        |
| Sbjct: 27667680                                                                                                 | tgatggttttttttaacgtgagggtgaggcgtgccataaatttagggcgcgtttctttaa  | 27667621   |
| Query: 147                                                                                                      | ctattttcctcattctaattattacgccttcataatattactatcaattttattttt     | 206        |
| Sbjct: 27667620                                                                                                 | ctattttcctcattctaattattacgccttcataatattactatcaattttattttt     | 27667561   |
| Query: 207                                                                                                      | atTTTTgttttgaatacagtcatttcactttcctaataaattcatttggttaactaaaata | 266        |
| Sbjct: 27667560                                                                                                 | atTTTTgttttgatacagtcatttcactttcctaataaattcatttggttaactaaaata  | 27667501   |
| Query: 267                                                                                                      | ataaaaattcatcattccacatatttaaatcaagccaatatttttagcaattaaatgatt  | 326        |
| Sbjct: 27667500                                                                                                 | ataaaaattcatcattccacatatttaaatcaagccaatatttttagcaattaaatgatt  | 27667441   |
| Query: 327                                                                                                      | ttcatgtcgagagtacaattcaaccaagttaagtattatacatttgatttatcattata   | 386        |
| Sbjct: 27667440                                                                                                 | ttcatgtcgagagtacaattcaaccaagttaagtattatacatttgatttatcattata   | 27667381   |
| Query: 387                                                                                                      | taagatcgtcgtataaatatgaaggtttgtttttattcataaaaagcatcagcatctaag  | 446        |
| Sbjct: 27667380                                                                                                 | taagatcgtcgtataaatatgaaggtttgtttttattcataaaaagcatcagcatctaag  | 27667321   |
| Query: 447                                                                                                      | gggtatgtaatgattctgagaagaatcggtaaaaggatacacaattgacaacactaaacg  | 506        |
| Sbjct: 27667320                                                                                                 | gggtatgtaatgattctgagaagaatcggtaaaaggatacacaattgacaacactaaacg  | 27667261   |
| Query: 507                                                                                                      | aatctttcaagattccacaacgcagtgagggaatcttgaccaagtcgaataacgtaa     | 566        |
| Sbjct: 27667260                                                                                                 | aatctttcaagattccacaacgcagtgagggaatcttgaccaagtcgaataacgtaa     | 27667201   |

Query: 567 cgcacgacccaagtcccctatcttctacatatttaacgagtggttctgttg-atccaata 625  
 |||  
 Sbjct: 27667200 cgcacgacccaagtcccctatcttctacatatttaacgagtggttctgttgatccaata 27667141

Query: 626 ctctgtctcg 634  
 |||  
 Sbjct: 27667140 ctctgtctcg 27667132

## B). FST sequences indicating complex T-DNA integration

### No. 1). Two adjacent insertions LB::RB

BLASTN 2.2.16 [Mar-25-2007]

Reference: Altschul, Stephen F., Thomas L. Madden, Alejandro A. Schaffer, Jinghui Zhang, Zheng Zhang, Webb Miller, and David J. Lipman (1997), "Gapped BLAST and PSI-BLAST: a new generation of protein database search programs", Nucleic Acids Res. 25:3389-3402.

Query= SKboxes93-96-2\_F21\_sk18105\_036.ab1  
 (754 letters)

Database: pski015 blast database created by Steve 210708  
 1 sequences; 10,138 total letters

Searching.....done

| Sequences producing significant alignments:                           | Score  | E     |
|-----------------------------------------------------------------------|--------|-------|
|                                                                       | (bits) | Value |
| pski015  sequence of T-DNA used in generation of mutated popul...     | 1158   | 0.0   |
| > pski015  sequence of T-DNA used in generation of mutated population |        |       |
| Length = 10138                                                        |        |       |
| Score = 1158 bits (584), Expect = 0.0                                 |        |       |
| Identities = 584/584 (100%)                                           |        |       |
| Strand = Plus / Minus                                                 |        |       |

Query: 171 tcaaacactgatagtttcggatctagatatcacatcaatccacttgctttgaagacgtgg 230  
 |||  
 Sbjct: 4272 tcaaacactgatagtttcggatctagatatcacatcaatccacttgctttgaagacgtgg 4213

Query: 231 ttggaacgtcttcttttccacgatgttcctcgtgggtgggggtccatctttgggaccac 290  
 |||  
 Sbjct: 4212 ttggaacgtcttcttttccacgatgttcctcgtgggtgggggtccatctttgggaccac 4153

Query: 291 tgtcggtagaggcatcttgaacgatagcctttcctttatcgcaatgatggcattttaga 350  
 |||  
 Sbjct: 4152 tgtcggtagaggcatcttgaacgatagcctttcctttatcgcaatgatggcattttaga 4093

Query: 351 agccatcttcttttctactgtcctttcgatgaagtacagatagctgggcaatggaatc 410  
 |||  
 Sbjct: 4092 agccatcttcttttctactgtcctttcgatgaagtacagatagctgggcaatggaatc 4033

Query: 411 cgaggaggtttcccgatattaccctttggtgaaaagtctcaatagcctctggtcttctg 470  
 |||  
 Sbjct: 4032 cgaggaggtttcccgatattaccctttggtgaaaagtctcaatagcctctggtcttctg 3973

Query: 471 agactgtatctttgatattcttggagtagacgagagtgctgctccaccatgttgggga 530  
 |||  
 Sbjct: 3972 agactgtatctttgatattcttggagtagacgagagtgctgctccaccatgttgggga 3913

Query: 531 tctagatatcacatcaatccacttgctttgaagacgtggttgaacgtcttcttttcca 590  
 |||  
 Sbjct: 3912 tctagatatcacatcaatccacttgctttgaagacgtggttgaacgtcttcttttcca 3853

Query: 591 cgatgttcctcgtgggtgggggtccatcctttgggaccactgtcggtagaggcatcttgaa 650  
|  
Sbjct: 3852 cgatgttcctcgtgggtgggggtccatcctttgggaccactgtcggtagaggcatcttgaa 3793

Query: 651 cgatagcctttcctttatcgcaatgatggcattttagaagccatcttccttttctactg 710  
|  
Sbjct: 3792 cgatagcctttcctttatcgcaatgatggcattttagaagccatcttccttttctactg 3733

Query: 711 tcctttcgatgaagtgcagatagctgggcaatggaatccgagg 754  
|  
Sbjct: 3732 tcctttcgatgaagtgcagatagctgggcaatggaatccgagg 3689

Score = 1122 bits (566), Expect = 0.0  
Identities = 566/566 (100%)  
Strand = Plus / Minus

Query: 189 ggatctagatatacacatcaatccacttgctttgaagacgtggttgaacgtcttcttttt 248  
|  
Sbjct: 3576 ggatctagatatacacatcaatccacttgctttgaagacgtggttgaacgtcttcttttt 3517

Query: 249 ccacgatgttcctcgtgggtgggggtccatcctttgggaccactgtcggtagaggcatctt 308  
|  
Sbjct: 3516 ccacgatgttcctcgtgggtgggggtccatcctttgggaccactgtcggtagaggcatctt 3457

Query: 309 gaacgatagcctttcctttatcgcaatgatggcattttagaagccatcttccttttcta 368  
|  
Sbjct: 3456 gaacgatagcctttcctttatcgcaatgatggcattttagaagccatcttccttttcta 3397

Query: 369 ctgtcctttcgatgaagtgcagatagctgggcaatggaatccgaggaggtttcccgata 428  
|  
Sbjct: 3396 ctgtcctttcgatgaagtgcagatagctgggcaatggaatccgaggaggtttcccgata 3337

Query: 429 ttaccctttgttgaagagctcaatagccctctggtcttctgagactgtatctttgatata 488  
|  
Sbjct: 3336 ttaccctttgttgaagagctcaatagccctctggtcttctgagactgtatctttgatata 3277

Query: 489 tcttgagtagacgagagtgctgctccaccatgttggggatctagatatacacatcaat 548  
|  
Sbjct: 3276 tcttgagtagacgagagtgctgctccaccatgttggggatctagatatacacatcaat 3217

Query: 549 ccacttgctttgaagacgtggttgaacgtcttctttttccacgatgttcctcgtgggtg 608  
|  
Sbjct: 3216 ccacttgctttgaagacgtggttgaacgtcttctttttccacgatgttcctcgtgggtg 3157

Query: 609 ggggtccatcctttgggaccactgtcggtagaggcatcttgaacgatagcctttcctttat 668  
|  
Sbjct: 3156 ggggtccatcctttgggaccactgtcggtagaggcatcttgaacgatagcctttcctttat 3097

Query: 669 cgcaatgatggcattttagaagccatcttccttttctactgtcctttcgatgaagtgc 728  
|  
Sbjct: 3096 cgcaatgatggcattttagaagccatcttccttttctactgtcctttcgatgaagtgc 3037

Query: 729 agatagctgggcaatggaatccgagg 754  
|  
Sbjct: 3036 agatagctgggcaatggaatccgagg 3011

Score = 1122 bits (566), Expect = 0.0  
Identities = 566/566 (100%)  
Strand = Plus / Minus

Query: 189 ggatctagatatacacatcaatccacttgctttgaagacgtggttgaacgtcttcttttt 248  
|  
Sbjct: 3915 ggatctagatatacacatcaatccacttgctttgaagacgtggttgaacgtcttcttttt 3856

Query: 249 ccacgatgttcctcgtgggtgggggtccatccttgggaccactgctcggtagaggcatcct 308  
 |||||||||||||||||||||||||||||||||||||||||||||||||||||||||||||  
 Sbjct: 3855 ccacgatgttcctcgtgggtgggggtccatccttgggaccactgctcggtagaggcatcct 3796

Query: 309 gaacgatagccttccctttatcgcaatgatggcatttgtagaagccatcttccttttcta 368  
 |||||||||||||||||||||||||||||||||||||||||||||||||||||||||||||  
 Sbjct: 3795 gaacgatagccttccctttatcgcaatgatggcatttgtagaagccatcttccttttcta 3736

Query: 369 ctgtcctttcgatgaagtgcagatagctgggcaatggaatccgaggaggtttcccgata 428  
 |||||||||||||||||||||||||||||||||||||||||||||||||||||||||||||  
 Sbjct: 3735 ctgtcctttcgatgaagtgcagatagctgggcaatggaatccgaggaggtttcccgata 3676

Query: 429 ttaccctttgttgaaggtctcaatagccctctggcttctgagactgtatccttgatat 488  
 |||||||||||||||||||||||||||||||||||||||||||||||||||||||||||||  
 Sbjct: 3675 ttaccctttgttgaaggtctcaatagccctctggcttctgagactgtatccttgatat 3616

Query: 489 tcttgagtagacgagagtgctgctgccaccatgttggggatctagatatcacatcaat 548  
 |||||||||||||||||||||||||||||||||||||||||||||||||||||||||||||  
 Sbjct: 3615 tcttgagtagacgagagtgctgctgccaccatgttggggatctagatatcacatcaat 3556

Query: 549 ccacttgctttgaagacgtgggtggaacgtcttctttttccacgatgttcctcgtgggtg 608  
 |||||||||||||||||||||||||||||||||||||||||||||||||||||||||||||  
 Sbjct: 3555 ccacttgctttgaagacgtgggtggaacgtcttctttttccacgatgttcctcgtgggtg 3496

Query: 609 ggggtccatctttgggaccactgctcggtagaggcatcttgaacgatagcctttcctttat 668  
 |||||||||||||||||||||||||||||||||||||||||||||||||||||||||||||  
 Sbjct: 3495 ggggtccatctttgggaccactgctcggtagaggcatcttgaacgatagcctttcctttat 3436

Query: 669 cgcaatgatggcatttgtagaagccatcttcttctactgtcctttcgatgaagtgc 728  
 |||||||||||||||||||||||||||||||||||||||||||||||||||||||||||||  
 Sbjct: 3435 cgcaatgatggcatttgtagaagccatcttcttctactgtcctttcgatgaagtgc 3376

Query: 729 agatagctgggcaatggaatccgagg 754  
 |||||||||||||||||||||  
 Sbjct: 3375 agatagctgggcaatggaatccgagg 3350

Score = 682 bits (344), Expect = 0.0  
 Identities = 344/344 (100%)  
 Strand = Plus / Minus

Query: 189 ggatctagatatcacatcaatccacttgcttgaagacgtgggtggaacgtcttcttttt 248  
 |||||||||||||||||||||||||||||||||||||||||||||||||||||||||||||  
 Sbjct: 3237 ggatctagatatcacatcaatccacttgcttgaagacgtgggtggaacgtcttcttttt 3178

Query: 249 ccacgatgttcctcgtgggtgggggtccatccttgggaccactgctcggtagaggcatcct 308  
 |||||||||||||||||||||||||||||||||||||||||||||||||||||||||||||  
 Sbjct: 3177 ccacgatgttcctcgtgggtgggggtccatccttgggaccactgctcggtagaggcatcct 3118

Query: 309 gaacgatagccttccctttatcgcaatgatggcatttgtagaagccatcttccttttcta 368  
 |||||||||||||||||||||||||||||||||||||||||||||||||||||||||||||  
 Sbjct: 3117 gaacgatagccttccctttatcgcaatgatggcatttgtagaagccatcttccttttcta 3058

Query: 369 ctgtcctttcgatgaagtgcagatagctgggcaatggaatccgaggaggtttcccgata 428  
 |||||||||||||||||||||||||||||||||||||||||||||||||||||||||||||  
 Sbjct: 3057 ctgtcctttcgatgaagtgcagatagctgggcaatggaatccgaggaggtttcccgata 2998

Query: 429 ttaccctttgttgaaggtctcaatagccctctggcttctgagactgtatccttgatat 488  
 |||||||||||||||||||||||||||||||||||||||||||||||||||||||||||||  
 Sbjct: 2997 ttaccctttgttgaaggtctcaatagccctctggcttctgagactgtatccttgatat 2938

Query: 489 tcttgagtagacgagagtgctgctgccaccatgttggggatc 532  
 |||||||||||||||||||||  
 Sbjct: 2937 tcttgagtagacgagagtgctgctgccaccatgttggggatc 2894

Score = 256 bits (129), Expect = 6e-71  
Identities = 141/145 (97%)  
Strand = Plus / Minus

Query: 18 attttataataacgctcgccgacatcgacatttttgaattgaaaaaacattggtaattact 77  
|||||  
Sbjct: 7852 attttataataacgctcgccgacatctacatttttgaattgaaaaaacattggtaattact 7793

Query: 78 ctttcttttctccatattgaccatcatactcattgctgatccatgtagatttcccggac 137  
|||||  
Sbjct: 7792 ctttcttttctccatattgaccatcatactcattgctgatccatgtagatttcccggac 7733

Query: 138 atgaagccatttacaattgaatata 162  
|||||  
Sbjct: 7732 atgaagccatttacaattgaatata 7708

## No. 2). Two independent insertions – left border

BLASTN 2.2.16 [Mar-25-2007]

Reference: Altschul, Stephen F., Thomas L. Madden, Alejandro A. Schaffer, Jinghui Zhang, Zheng Zhang, Webb Miller, and David J. Lipman (1997), "Gapped BLAST and PSI-BLAST: a new generation of protein database search programs", Nucleic Acids Res. 25:3389-3402.

Query= SKboxes159-162-1\_G13\_sk24196\_014.abl CHROMAT\_FILE:  
SKboxes159-162-1\_G13\_sk24196\_014.abl PHD\_FILE:  
SKboxes159-162-1\_G13\_sk24196\_014.abl.phd.1 CHEM: term DYE: big TIME:  
Fri Mar 2 16:34:59 2007  
(731 letters)

Database: TAIR 8 pseudochromosome database created by Steve on July 15 2008

7 sequences; 119,707,899 total letters

Searching.....done

| Sequences producing significant alignments:                         | Score  | E     |
|---------------------------------------------------------------------|--------|-------|
|                                                                     | (bits) | Value |
| Chr2 CHROMOSOME dumped from ADB: Mar/14/08 12:28; last updated: ... | 256    | 6e-67 |
| Chr5 CHROMOSOME dumped from ADB: Mar/14/08 12:29; last updated: ... | 228    | 1e-58 |

>Chr2 CHROMOSOME dumped from ADB: Mar/14/08 12:28; last updated: 2007-12-20  
Length = 19705359

Score = 256 bits (129), Expect = 6e-67  
Identities = 141/145 (97%)  
Strand = Plus / Minus

Query: 176 atcccttgggatgacatgctgttttcggggttttgtttctcgatcattaattagattctag 235  
|||||  
Sbjct: 7902094 atcccttgggatgacatgctgttttcggggttttgtttctcgatcattaattagtttctag 7902035

Query: 236 aaagagagacgacgtcaagagtcaaaaccaaataaaaggaggaaaccacacgcgcttgaa 295  
|||||  
Sbjct: 7902034 aaagagagacgacgtcaagagtcaaaaccaaataaaaggaggaaaccacacgcgcttgaa 7901975

Query: 296 atgttcatagatttcttcacctttg 320  
|||||  
Sbjct: 7901974 atgttcatagtttcttcacctttg 7901950

>Chr5 CHROMOSOME dumped from ADB: Mar/14/08 12:29; last updated: 2007-12-20  
Length = 26992728



Identities = 86/97 (88%)  
Strand = Plus / Minus

Query: 448 aagaacattaaatctaacattttcttattgtacactaattcactaacaatcagatctgat 507  
||||| ||| | ||||||||||||||||||| | ||||||||||||||||||| |  
Sbjct: 10399447 aagaacatgaaagcaaacattttcttattgtacacctagtactaacaatcagatctgct 10399388

Query: 508 agtatgttcttattttaaacaacttactactcaactt 544  
||| ||||||||||| ||||||||||| |||||||||  
Sbjct: 10399387 agtttgttcttatttcaaacaacttagcactcaactt 10399351

### No. 4). Two insertions nested – in left border

BLASTN 2.2.16 [Mar-25-2007]

Reference: Altschul, Stephen F., Thomas L. Madden, Alejandro A. Schaffer, Jinghui Zhang, Zheng Zhang, Webb Miller, and David J. Lipman (1997), "Gapped BLAST and PSI-BLAST: a new generation of protein database search programs", Nucleic Acids Res. 25:3389-3402.

Query= SKbox298\_013\_sk39195\_015.ab1  
(760 letters)

Database: pski015 blast database created by Steve 210708  
1 sequences; 10,138 total letters

Searching.....done

| Sequences producing significant alignments:                                                | Score  | E     |
|--------------------------------------------------------------------------------------------|--------|-------|
|                                                                                            | (bits) | Value |
| pski015  sequence of T-DNA used in generation of mutated popul...                          | 149    | 9e-39 |
| > pski015  sequence of T-DNA used in generation of mutated population<br>Length = 10138    |        |       |
| Score = 149 bits (75), Expect = 9e-39<br>Identities = 84/87 (96%)<br>Strand = Plus / Minus |        |       |

Query: 38 ataataaagctgcgacatctacattttgaattgaaaaaaaaattggtaattactctttc 97  
||||| ||||||||||||||||||| ||||||||||||||||||| |||||||||||||||||||  
Sbjct: 7847 ataataacgtgcgacatctacattttgaattgaaaaaaaaattggtaattactctttc 7788

Query: 98 ttttctccatagaccatcactc 124  
||||| |||||||||||  
Sbjct: 7787 ttttctccatattgaccatcactc 7761

Score = 99.6 bits (50), Expect = 8e-24  
Identities = 56/58 (96%)  
Strand = Plus / Minus

Query: 140 gaattgaaaaaaaaattggtaattactctttctttcccatattgaccatcttactc 197  
||||| ||||||||||||||||||| ||||||||||||||||||| |||||||||||||||||||  
Sbjct: 7818 gaattgaaaaaaaaattggtaattactctttctttctccatattgaccatcactc 7761

### No. 5). Two adjacent insertions – LB::LB

BLASTN 2.2.16 [Mar-25-2007]

Reference: Altschul, Stephen F., Thomas L. Madden, Alejandro A. Schaffer, Jinghui Zhang, Zheng Zhang, Webb Miller, and David J. Lipman (1997),

"Gapped BLAST and PSI-BLAST: a new generation of protein database search programs", Nucleic Acids Res. 25:3389-3402.

Query= SKbox242-245\_E14\_sk33079\_019.ab1  
(768 letters)

Database: pski015 blast database created by Steve 210708  
1 sequences; 10,138 total letters

Searching.....done

| Sequences producing significant alignments:                       | Score  | E     |
|-------------------------------------------------------------------|--------|-------|
|                                                                   | (bits) | Value |
| pski015  sequence of T-DNA used in generation of mutated popul... | 182    | 7e-49 |

>|pski015| sequence of T-DNA used in generation of mutated population  
Length = 10138

Score = 182 bits (92), Expect = 7e-49  
Identities = 92/92 (100%)  
Strand = Plus / Minus

Query: 70 aaattggtaattactctttcttttctccatattgaccatcatactcattgctgatccat 129  
|||||  
Sbjct: 7807 aaattggtaattactctttcttttctccatattgaccatcatactcattgctgatccat 7748

Query: 130 gtagatttcccgacatgaagccatttacaat 161  
|||||  
Sbjct: 7747 gtagatttcccgacatgaagccatttacaat 7716

Score = 174 bits (88), Expect = 2e-46  
Identities = 118/128 (92%)  
Strand = Plus / Plus

Query: 180 ggatatattcaattgtaaatggcttcatgtacgggaaatctacatggatcagcaatgagt 239  
|||||  
Sbjct: 7705 ggatatattcaattgtaaatggcttcatgtccgggaaatctacatggatcagcaatgagt 7764

Query: 240 atgatgggtcaagatggaggaaaagaaagatgttttccaattttttatcattcatcaat 299  
|||||  
Sbjct: 7765 atgatgggtcaatggaggaaaagaaagatgtattaccaatttttttcaattcaaaaat 7824

Query: 300 gtagatgt 307  
|||||  
Sbjct: 7825 gtagatgt 7832

## No. 6). Three insertions – two nested in a third

BLASTN 2.2.16 [Mar-25-2007]

Reference: Altschul, Stephen F., Thomas L. Madden, Alejandro A. Schaffer, Jinghui Zhang, Zheng Zhang, Webb Miller, and David J. Lipman (1997), "Gapped BLAST and PSI-BLAST: a new generation of protein database search programs", Nucleic Acids Res. 25:3389-3402.

Query= SKboxes250-253\_I10\_sk33850\_053.ab1  
(746 letters)

Database: pski015 blast database created by Steve 210708  
1 sequences; 10,138 total letters

Searching.....done

| Sequences producing significant alignments: | Score  | E     |
|---------------------------------------------|--------|-------|
|                                             | (bits) | Value |



|pski015| sequence of T-DNA used in generation of mutated popul... 206 5e-56

>|pski015| sequence of T-DNA used in generation of mutated population  
Length = 10138

Score = 206 bits (104), Expect = 5e-56  
Identities = 107/108 (99%)  
Strand = Plus / Minus

Query: 159 aaacactgatagtttcggatctagatatcacatcaatccacttgctttgaagacgtgggt 218  
|||||  
Sbjct: 4270 aaacactgatagtttcggatctagatatcacatcaatccacttgctttgaagacgtgggt 4211

Query: 219 ggaacgtcttctttttccacgatgttctcgtgggtgggggtccatct 266  
|||||  
Sbjct: 4210 ggaacgtcttctttttccacgatgttctcgtgggtgggggtccatct 4163

Score = 174 bits (88), Expect = 2e-46  
Identities = 91/92 (98%)  
Strand = Plus / Minus

Query: 175 ggatctagatatcacatcaatccacttgctttgaagacgtgggtggaacgtcttcttttt 234  
|||||  
Sbjct: 3237 ggatctagatatcacatcaatccacttgctttgaagacgtgggtggaacgtcttcttttt 3178

Query: 235 ccacgatgttctcgtgggtgggggtccatct 266  
|||||  
Sbjct: 3177 ccacgatgttctcgtgggtgggggtccatct 3146

Score = 174 bits (88), Expect = 2e-46  
Identities = 91/92 (98%)  
Strand = Plus / Minus

Query: 175 ggatctagatatcacatcaatccacttgctttgaagacgtgggtggaacgtcttcttttt 234  
|||||  
Sbjct: 3576 ggatctagatatcacatcaatccacttgctttgaagacgtgggtggaacgtcttcttttt 3517

Query: 235 ccacgatgttctcgtgggtgggggtccatct 266  
|||||  
Sbjct: 3516 ccacgatgttctcgtgggtgggggtccatct 3485

Score = 174 bits (88), Expect = 2e-46  
Identities = 91/92 (98%)  
Strand = Plus / Minus

Query: 175 ggatctagatatcacatcaatccacttgctttgaagacgtgggtggaacgtcttcttttt 234  
|||||  
Sbjct: 3915 ggatctagatatcacatcaatccacttgctttgaagacgtgggtggaacgtcttcttttt 3856

Query: 235 ccacgatgttctcgtgggtgggggtccatct 266  
|||||  
Sbjct: 3855 ccacgatgttctcgtgggtgggggtccatct 3824

Score = 93.7 bits (47), Expect = 5e-22  
Identities = 84/95 (88%), Gaps = 1/95 (1%)  
Strand = Plus / Minus

Query: 55 catttttgaattgaatcaaa-tggtagttactctttctttctccatattgaccatca 113  
|||||  
Sbjct: 7825 catttttgaattgaaaaaaaaattggtaattactctttctttctccatattgaccatca 7766

Query: 114 tactctctgctcatccacaaagatttcccgacat 148

||||| |||| | ||||| ||||| ||||| ||||| |||||  
Sbjct: 7765 tactcattgctgatccatgtagatttcccgacat 7731

Score = 67.9 bits (34), Expect = 3e-14  
Identities = 40/42 (95%)  
Strand = Plus / Minus

Query: 412 gtaatttggttataatcaaaaatgtactttcattttataata 453  
||||| ||||| ||||| ||||| ||||| ||||| ||||| ||||| ||||| ||||| ||||| ||||| ||||| ||||| ||||| |||||  
Sbjct: 7883 gtaatttgctgtttatcaaaaatgtactttcattttataata 7842

Score = 52.0 bits (26), Expect = 2e-09  
Identities = 53/62 (85%)  
Strand = Plus / Minus

Query: 293 acttacattttataaatgacgatgaggactttttttttggaattgaaaaaaatgggta 352  
||||| ||||| ||||| ||||| ||||| ||||| ||||| ||||| ||||| ||||| ||||| ||||| ||||| ||||| ||||| ||||| |||||  
Sbjct: 7858 actttcattttataaataacgctgaggacatctacatttttgaattgaaaaaaatgggta 7799

Query: 353 at 354  
||  
Sbjct: 7798 at 7797

No. 7). Two insertions with replicated LB sequence

BLASTN 2.2.16 [Mar-25-2007]

Reference: Altschul, Stephen F., Thomas L. Madden, Alejandro A. Schaffer, Jinghui Zhang, Zheng Zhang, Webb Miller, and David J. Lipman (1997), "Gapped BLAST and PSI-BLAST: a new generation of protein database search programs", Nucleic Acids Res. 25:3389-3402.

Query= SKbox315-318\_C06\_sk40665\_089.ab1  
(662 letters)

Database: pski015 blast database created by Steve 210708  
1 sequences; 10,138 total letters

Searching.....done

| Sequences producing significant alignments:                                             | Score<br>(bits) | E<br>Value |
|-----------------------------------------------------------------------------------------|-----------------|------------|
| [pski015] sequence of T-DNA used in generation of mutated popul...                      | 303             | 2e-85      |
| > pski015  sequence of T-DNA used in generation of mutated population<br>Length = 10138 |                 |            |

Score = 303 bits (153), Expect = 2e-85  
Identities = 216/236 (91%), Gaps = 1/236 (0%)  
Strand = Plus / Minus

Query: 193 aataaagatttccgaattagaataaattggttatgtgctttcgctatccatacgcgga 252  
||||| ||||| ||||| ||||| ||||| ||||| ||||| ||||| ||||| ||||| ||||| ||||| ||||| ||||| ||||| ||||| |||||  
Sbjct: 7944 aataaagatttccgaattagaataaattggttat-tgctttcgctataaatacgcgga 7886

Query: 253 tcgtaatttgcggtttgtcaaaaatgaactttcattttataaataacgctgaggacgtc 312  
||||| ||||| ||||| ||||| ||||| ||||| ||||| ||||| ||||| ||||| ||||| ||||| ||||| ||||| ||||| ||||| |||||  
Sbjct: 7885 tcgtaatttgcggttttatcaaaaatgtactttcattttataaataacgctgaggacatc 7826

Query: 313 cttttttgaattgaaaaagaattgggaattgcgctttctttctccgtgttgaccatca 372  
||||| ||||| ||||| ||||| ||||| ||||| ||||| ||||| ||||| ||||| ||||| ||||| ||||| ||||| ||||| ||||| |||||  
Sbjct: 7825 cttttttgaattgaaaaaaatggtaattactctttctttctccatattgaccatca 7766

Query: 373 tactcgtgtctcatgctggagatttccggacatgaagccctttaccnttgaata 428  
||||| ||||| || | || | ||||| ||||| ||||| ||||| ||||| ||||| ||||| ||||| ||||| ||||| ||||| |||||

Sbjct: 7765 tactcattgctgatccatgtagatttcccggacatgaagccattacaattgaata 7710

Score = 153 bits (77), Expect = 5e-40  
Identities = 84/85 (98%), Gaps = 1/85 (1%)  
Strand = Plus / Minus

Query: 11 ctctttcttttctctc-atattgaccatcatactcattgctgatccatgtagatttcccgg 69  
|||||  
Sbjct: 7794 ctctttcttttctcctccatattgaccatcatactcattgctgatccatgtagatttcccgg 7735

Query: 70 acatgaagccattacaattgaata 94  
|||||  
Sbjct: 7734 acatgaagccattacaattgaata 7710

Score = 151 bits (76), Expect = 2e-39  
Identities = 76/76 (100%)  
Strand = Plus / Minus

Query: 586 aaataaagatttccgaattagaataatttgtttattgctttcgctataaatacgcgga 645  
|||||  
Sbjct: 7945 aaataaagatttccgaattagaataatttgtttattgctttcgctataaatacgcgga 7886

Query: 646 tcgtaatttgcgttt 661  
|||||  
Sbjct: 7885 tcgtaatttgcgttt 7870

## No. 8). Two insertions nested in Ti backbone

BLASTN 2.2.16 [Mar-25-2007]

Reference: Altschul, Stephen F., Thomas L. Madden, Alejandro A. Schaffer, Jinghui Zhang, Zheng Zhang, Webb Miller, and David J. Lipman (1997), "Gapped BLAST and PSI-BLAST: a new generation of protein database search programs", Nucleic Acids Res. 25:3389-3402.

Query= SKboxes78-81-2\_C21\_sk16974\_041.ab1  
(742 letters)

Database: pski015 blast database created by Steve 210708  
1 sequences; 10,138 total letters

Searching.....done

Sequences producing significant alignments:

|                                                                       | Score  | E     |
|-----------------------------------------------------------------------|--------|-------|
|                                                                       | (bits) | Value |
| pski015  sequence of T-DNA used in generation of mutated popul...     | 188    | 1e-50 |
| > pski015  sequence of T-DNA used in generation of mutated population |        |       |
| Length = 10138                                                        |        |       |

Score = 188 bits (95), Expect = 1e-50  
Identities = 101/103 (98%)  
Strand = Plus / Minus

Query: 63 attggaataactccttctttctccatattgaccatcatactccttgctgatccatga 122  
|||||  
Sbjct: 7805 attggaataactccttctttctccatattgaccatcatactcattgctgatccatgt 7746

Query: 123 agatttcccggacatgaagccattacaattgaatatatcctg 165  
|||||  
Sbjct: 7745 agatttcccggacatgaagccattacaattgaatatatcctg 7703

Score = 99.6 bits (50), Expect = 8e-24

Identities = 99/114 (86%), Gaps = 1/114 (0%)  
Strand = Plus / Minus

Query: 219 ttcccgaaatgtgctccctaataatggatgagggcataatcggacgctgacgccctcaac 278  
||||| |  
Sbjct: 5999 ttcccgcatgtgctcccaaataatggatgacgagcgcatacggagcgttaacgccctcgac 5940

Query: 279 aaccgcctcaccgcaaggaaggcagcgacgcagcctgatcacgsggggcttct 332  
| |  
Sbjct: 5939 atccgcctcaccgcaggaacgcaac-cgcagcctcatcacgsggcttct 5887

## No. 9). Single imprecise left border sequence

BLASTN 2.2.16 [Mar-25-2007]

Reference: Altschul, Stephen F., Thomas L. Madden, Alejandro A. Schaffer, Jinghui Zhang, Zheng Zhang, Webb Miller, and David J. Lipman (1997), "Gapped BLAST and PSI-BLAST: a new generation of protein database search programs", *Nucleic Acids Res.* 25:3389-3402.

Query= SKboxes222-225-3\_E20\_sk31075\_022.ab1  
(763 letters)

Database: pski015 blast database created by Steve 210708  
1 sequences; 10,138 total letters

Searching.....done

| Sequences producing significant alignments:                       | Score  | E     |
|-------------------------------------------------------------------|--------|-------|
|                                                                   | (bits) | Value |
| pski015  sequence of T-DNA used in generation of mutated popul... | 444    | e-127 |

>|pski015| sequence of T-DNA used in generation of mutated population  
Length = 10138

Score = 444 bits (224), Expect = e-127  
Identities = 381/434 (87%)  
Strand = Plus / Minus

Query: 163 ttgcagccggtggagcttgcatggtggtttctaccagaaaagagccggaaggaagat 222  
||||| |  
Sbjct: 7689 ttgcacccgggtggagcttgcatggtggtttctacgcagaaactgagccggttaggcagat 7630

Query: 223 aatttgtattgtgaactgagccatgtacaccatcccccaaacacggtgagcgaaggggca 282  
||||| |  
Sbjct: 7629 aatttccattgagaactgagccatgtgcaccttcccccaaacacggtgagcgaaggggca 7570

Query: 283 acggagtggtctatatgggaattttaaacatcatccctcggatggagttgcgagagaggc 342  
||||| |  
Sbjct: 7569 acggagtgatccacatgggacttttaaacatcatccgctcggatggcgttgagagagaagc 7510

Query: 343 ggacgatccgtgatatacagccgtagcactggcaggttcgtcccagatcgcaaaggagt 402  
| |  
Sbjct: 7509 agtcgatccgtgatatacagccgtagcactggcaggttcgtcccagatcgcaaagtatt 7450

Query: 403 tgaacgtaggtacaatctagccgacggttcgccaacacgccaagcaagctagctt 462  
||||| |  
Sbjct: 7449 tgaacgaggtacaatctagccgacggttcgccaacacgccaagcaagctagctt 7390

Query: 463 gcggttcgcccggaaacacgagcagcgaccgggaccactatgccaagagtgcgcaagg 522  
| |  
Sbjct: 7389 gcaattcaccgcaacacgagcagcgaccgggaccactatgccaagagtgcgcaagg 7330

Query: 523 taaaagtggcggggccgctatgaagtccgtaagtccccgagggccgaagtgagaggta 582  
| |  
Sbjct: 7330 taaaagtggcggggccgctatgaagtccgtaagtccccgagggccgaagtgagaggta 582

Sbjct: 7329 taaaaattgcccgcgcccccgccatgaagtccgtgaatgccccgacggccgaagtgaaggca 7270

Query: 583 ggccgccacccagg 596

|||||

Sbjct: 7269 ggccgccacccagg 7256

Score = 147 bits (74), Expect = 4e-38  
Identities = 107/118 (90%)  
Strand = Plus / Minus

Query: 39 gcggacatcgacatTTTTgaattgaaatacaattggtaattactctttcttttctccat 98

|||||

Sbjct: 7836 gcggacatctacatTTTTgaattgaaaaaaattggtaattactctttcttttctccat 7777

Query: 99 attgaccatcatactctctgctcctccacaaggatttccggacatgaagccatttac 156

|||||

Sbjct: 7776 attgaccatcatactcattgctgatccatgtagatttccggacatgaagccatttac 7719

### No. 10). Two inserts nested inside T-DNA sequence

BLASTN 2.2.16 [Mar-25-2007]

Reference: Altschul, Stephen F., Thomas L. Madden, Alejandro A. Schaffer, Jinghui Zhang, Zheng Zhang, Webb Miller, and David J. Lipman (1997), "Gapped BLAST and PSI-BLAST: a new generation of protein database search programs", Nucleic Acids Res. 25:3389-3402.

Query= SKBOX12\_C12\_sk1170\_087.ab1  
(830 letters)

Database: pski015 blast database created by Steve 210708  
1 sequences; 10,138 total letters

Searching.....done

Sequences producing significant alignments:

|                                                                   | Score<br>(bits) | E<br>Value |
|-------------------------------------------------------------------|-----------------|------------|
| pski015  sequence of T-DNA used in generation of mutated popul... | 289             | 4e-81      |

>|pski015| sequence of T-DNA used in generation of mutated population  
Length = 10138

Score = 289 bits (146), Expect = 4e-81  
Identities = 201/218 (92%), Gaps = 1/218 (0%)  
Strand = Plus / Plus

Query: 250 cagcttttgttcccttagggagggttaatttcaagcttgcctaataatcatggccatagtt 309  
|||||

Sbjct: 1 cagcttttgttcccttagtgagggttaattccgagcttggcgtaataatcatggctcatagct 60

Query: 310 gtttctgctgcgaaattgttatccgctcacaattccacacacacatccgagccggaagca 369  
|||||

Sbjct: 61 gtttctgctgtgaaattgttatccgctcacaattccacaca-acatacagccggaagca 119

Query: 370 tacagtgtaaagcctggggcgcctaataatgagtgagctaactctcattaattgccttgcgct 429  
||

Sbjct: 120 taaagtgtaaagcctggggtgcctaataatgagtgagctaactcacattaattgcgttgcgct 179

Query: 430 cactgccccttttccagtcgggaaacctgtcggtgccag 467  
|||||

Sbjct: 180 cactgcccgttttccagtcgggaaacctgtcggtgccag 217

Score = 103 bits (52), Expect = 5e-25  
Identities = 82/92 (89%)  
Strand = Plus / Minus

Query: 139 actcttttttttccatattgaccatcatactcattgttgattccccacatttcccg 198  
|||||  
Sbjct: 7795 actctttcttttccatattgaccatcatactcattgctgatccatgtagatttcccg 7736

Query: 199 gacatgaagccatttacaattgggtatcct 230  
|||||  
Sbjct: 7735 gacatgaagccatttacaattgaatatacct 7704
